# Supplementary material
Source: MDPI journal article supplement (https://www.mdpi.com/2227-7390/9/20/2607)
Supplement: s1 [file s1]

## In[1]:= Stability analysis of RM1 and RM2;

Constants:

```
In[2]:= alpha = p = 2;  
beta = q = 1;  
c = 1;  
g = 1;  
d = 2;  
f = 2;
```

normalized values to 6022 (meeting the condition  $z_0^{(1/q)} > x_0 \cdot a_0^f$ )

```
In[8]:= x0 = 1;  
y0 = 1.5;  
z0 = 3.5;  
a0 = 1.125;  
b0 = 1.5;
```

---

## Cases from Table 4

### RM2s

Case 1 :  $x' = y' = 0$ , var  $a, b$

Case 2 :  $y' = a' = 0$ , var  $x, b$

Case 3 :  $a' = b' = 0$ , var  $x, y$

### Steady States Case 1

```
In[13]:= RM2sc1 = Solve[{-x * a^f - y * b * a^g == 0, x * a^f - y * b * a^g == 0}, {a, b}]
```

 **Solve:** Equations may not give solutions for all "solve" variables.

```
Out[13]= {{a -> 0}, {a -> 0, b -> 0}}
```

```
In[14]:= Show[StreamPlot[{-x0 * a^f - y0 * b * a^g, x0 * a^f - y0 * b * a^g},
  {a, 0, 1}, {b, 0, 1}, Frame → True, FrameStyle → Directive[Black, 15],
  FrameLabel → {Style["a", 18], Style["b", 18]}, FrameTicks → Automatic,
  FrameTicksStyle → Directive[Thick, Black, 15], LabelStyle → Directive[Black],
  PlotLabel → Style["Variables: a, b", Large], StreamColorFunction → None,
  StreamStyle → Black], Graphics[{PointSize[Large], Red, Point[{0, 0}]}],
  FrameStyle → {Thick, Directive[Thick, Black]}]
```

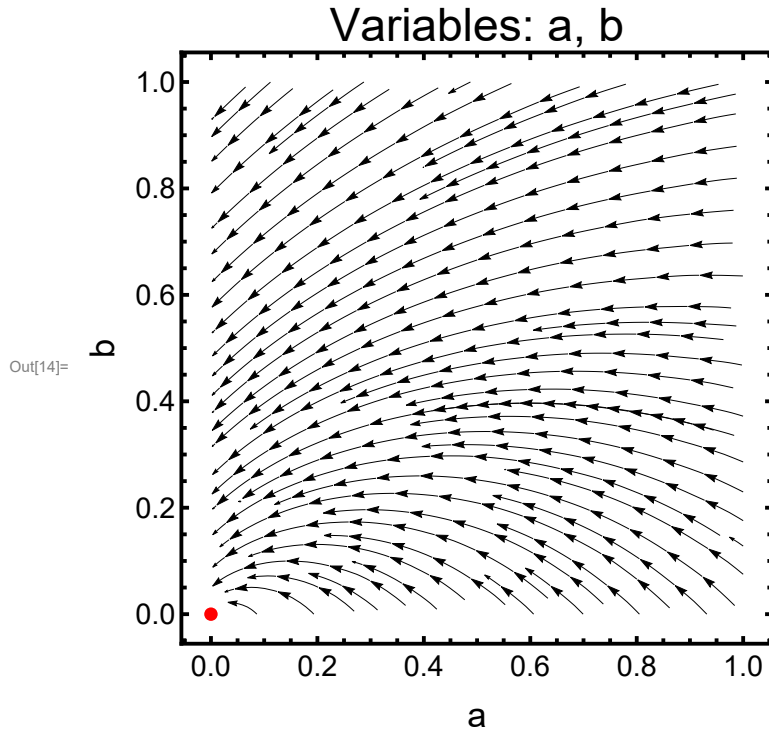

Type of critical point

Calculate the Jacobian

```
In[15]:= Jc1 = D[{-x * a^f - y * b * a^g, x * a^f - y * b * a^g}, {{a, b}}]
```

```
Out[15]= {{-2 a x - b y, -a y}, {2 a x - b y, -a y}}
```

Calculate the Jacobian for the found steady states

```
In[16]:= Jsc1 = Jc1 /. RM2sc1[[2]]
```

```
Out[16]= {{0, 0}, {0, 0}}
```

## Steady States Case 2

```
In[17]:= RM2sc2 = Solve[{z^(1/p) - x * a^f == 0, x * a^f - y * b * a^g == 0}, {x, b}]
```

```
Out[17]= {{x -> (sqrt(z)/a^2), b -> (sqrt(z)/a y)}}
```

Steady State at given values

```
In[18]:= solRM2sc2 = RM2sc2[[1]] /. {y -> y0, z -> z0, a -> a0};
xsolc2 = (Part[solRM2sc2, 1] /. Rule -> List)[[2]];
bsolc2 = (Part[solRM2sc2, 2] /. Rule -> List)[[2]];
```

```
In[21]:= Show[StreamPlot[{z0^(1/p) - x * a0^f, x * a0^f - y0 * b * a0^g},
  {x, 0, 2}, {b, 0, 2}, Frame → True, FrameStyle → Directive[Black, 18],
  FrameLabel → {Style["x", 18], Style["b", 18]}, FrameTicks → Automatic,
  FrameTicksStyle → Directive[Thick, Black, 15], LabelStyle → Directive[Black],
  PlotLabel → Style["Variables: x, b", Large], StreamColorFunction → None,
  StreamStyle → Black], Graphics[{PointSize[Large], Red, Point[{xsolc2, bsolc2}]}],
  FrameStyle → {Thick, Directive[Thick, Black]}]
```

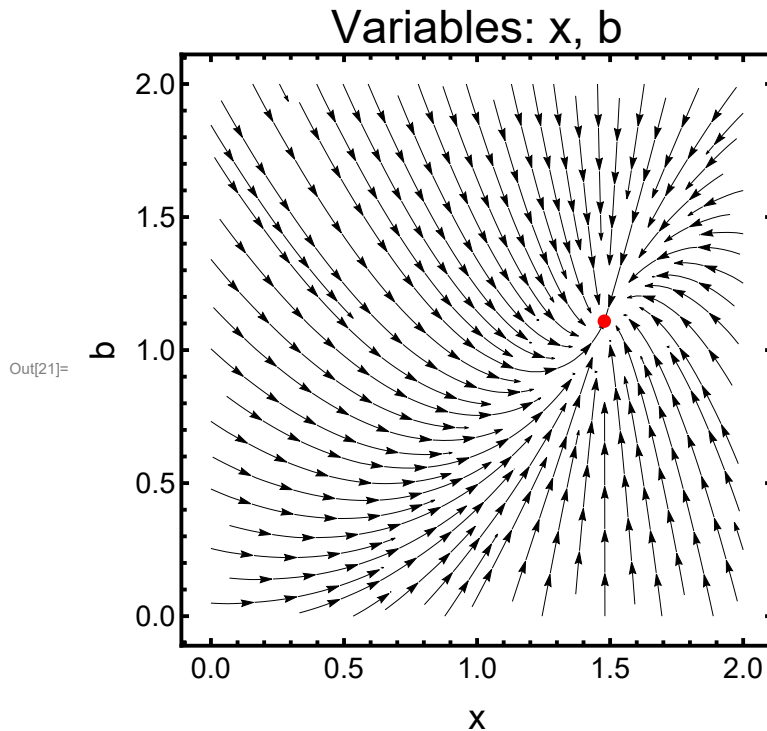

Type of critical point

Calculate the Jacobian

```
In[22]:= Jc2 = D[{z^(1/p) - x * a^f, a^f - y * b * a^g}, {{x, b}}]
```

```
Out[22]= {{-a^2, 0}, {0, -a y}}
```

Calculate the Jacobian for the found steady states

```
In[23]:= Jc21 = Jc2 /. RM2sc2[[1]]
```

```
Out[23]= {{-a^2, 0}, {0, -a y}}
```

Eigen value equation (expansion of the characteristic equation)

```
In[24]:= eve1 = Solve[1^2 - 1 * Tr[Jc21] + Det[Jc21] == 0, 1]
```

```
Out[24]= {{1 -> -a^2}, {1 -> -a y}}
```

Analyse the sign of  $\text{Tr}[J]$ ,  $\text{Det}[J]$  and  $\text{Tr}[J]^2 - 4 \text{Det}[J]$

```
In[25]:= Trc2 = Tr[Jc21]
Dc2 = Det[Jc21]
Sc2 = Tr[Jc21]^2 - 4 Det[Jc21]
Simplify[Sc2]
```

```
Out[25]= -a^2 - a y
```

```
Out[26]= a^3 y
```

```
Out[27]= -4 a^3 y + (-a^2 - a y)^2
```

```
Out[28]= a^2 (a - y)^2
```

### Steady States Case 3

```
In[29]:= RM2sc3 = Solve[{z^(1/p) - x * a^f == 0, z^(1/q) - y * b * a^g == 0}, {x, y}]
```

```
Out[29]= {{x -> (sqrt(z)/a^2), y -> (z/(a b))}}
```

Steady State at given values

```
In[30]:= solRM2sc3 = RM2sc3[[1]] /. {z -> z0, a -> a0, b -> b0};
```

```
xsolc3 = (Part[solRM2sc3, 1] /. Rule -> List)[[2]];
ysolc3 = (Part[solRM2sc3, 2] /. Rule -> List)[[2]];

```

```
In[33]:= Show[StreamPlot[{z0^(1/p) - x * a0^f, z0^(1/q) - y * b0 * a0^g},
  {x, 0, 2}, {y, 1, 3}, Frame -> True, FrameStyle -> Directive[Black, 18],
  FrameLabel -> {Style["x", 18], Style["y", 18]}, FrameTicks -> Automatic,
  FrameTicksStyle -> Directive[Thick, Black, 15], LabelStyle -> Directive[Black],
  PlotLabel -> Style["Variables: x, y", Large], StreamColorFunction -> None,
  StreamStyle -> Black], Graphics[{PointSize[Large], Red, Point[{xsolc3, ysolc3}]}],
  FrameStyle -> {Thick, Directive[Thick, Black]}]
```

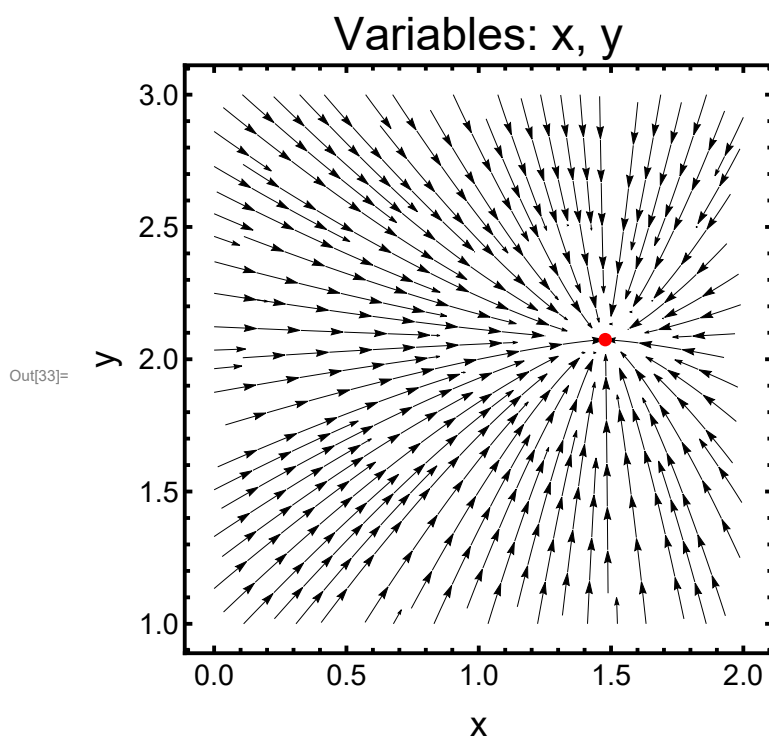

Type of critical point

Calculate the Jacobian

```
In[34]:= Jc3 = D[{z^(1/p) - x * a^f, z^(1/q) - y * b * a^g}, {{x, y}}]
```

```
Out[34]= {{-a^2, 0}, {0, -a b}}
```

Calculate the Jacobian for the found steady states

```
In[35]:= Jc31 = Jc3 /. RM2sc3[[1]]
```

```
Out[35]= {{-a^2, 0}, {0, -a b}}
```

Eigen value equation (expansion of the characteristic equation)

```
In[36]:= eve3 = Solve[1^2 - 1 * Tr[Jc31] + Det[Jc31] == 0, 1]
```

```
Out[36]= {{1 -> -a^2}, {1 -> -a b}}
```

Analyse the sign of Tr[J], Det[J] and Tr[J]^2 - 4 Det[J]

```
In[37]:= Trc3 = Tr[Jc31]
```

```
Dc3 = Det[Jc31]
```

```
Sc3 = Tr[Jc31]^2 - 4 Det[Jc31]
```

```
Simplify[Sc3]
```

```
Out[37]= -a^2 - a b
```

```
Out[38]= a^3 b
```

```
Out[39]= -4 a^3 b + (-a^2 - a b)^2
```

```
Out[40]= a^2 (a - b)^2
```

## RM2

Case 4 :  $x' = y' = 0$ , var  $a, b \Rightarrow$  same as case 1 RM2s

Case 5 :  $x' = a' = 0$ , var  $y, b$

Case 6 :  $y' = a' = 0$ , var  $x, b \Rightarrow$  same as case 2 RM2s

Case 7:  $a' = b' = 0$ , var  $x, y$

Case 8:  $a' = 0$ , var  $x, y, b$

## Steady States Case 5

```
In[41]:= RM2c5 = Solve[{z^(1/q) - y * b * a^g - y * a^d == 0, x * a^f - y * b * a^g == 0}, {y, b}]
```

```
Out[41]= {{y -> -a^2 x + z / a^2, b -> -a^3 x / (a^2 x - z)}}
```

Steady State at given values

```
In[42]:= solRM2c5 = RM2c5[[1]] /. {x -> x0, z -> z0, a -> a0};
```

```
ysolc5 = (Part[solRM2c5, 1] /. Rule -> List)[[2]];
```

```
bsolc5 = (Part[solRM2c5, 2] /. Rule -> List)[[2]];
```

```

In[45]:= Show[StreamPlot[{z0^(1/q) - y*b*a0^g - y*a0^d, x0*a0^f - y*b*a0^g},
  {y, 0, 2}, {b, 0, 2}, Frame → True, FrameStyle → Directive[Black, 15],
  FrameLabel → {Style["y", 18], Style["b", 18]},
  FrameTicks → Automatic, FrameTicksStyle → Directive[Thick, Black, 15],
  LabelStyle → Directive[Black], PlotLabel → Style["Variables: y, b", Large],
  StreamColorFunction → None, StreamStyle → Black],
Graphics[{PointSize[Large], Red, Point[{ysolc5, bsolc5}]}],
FrameStyle → {Thick, Directive[Thick, Black]}]

```

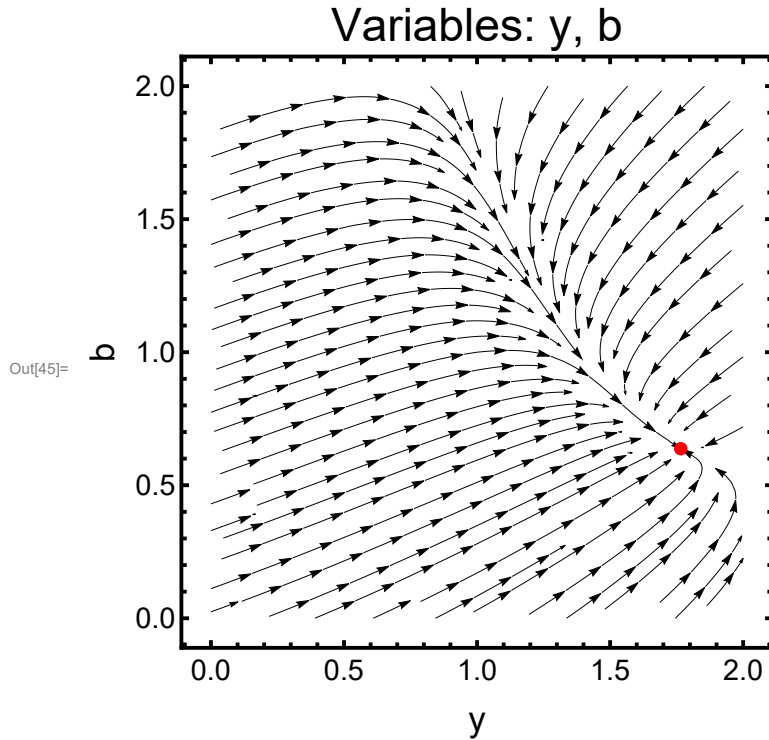

### Steady States Case 7

```

In[46]:= RM2c7 = Solve[{z^(1/p) - x*a^f == 0, z^(1/q) - y*b*a^g - y*a^d == 0}, {x, y}]

```

```

Out[46]:= {{x -> (Sqrt[z])/a^2, y -> z/(a*(a+b))}}

```

Steady State at given values

```

In[47]:= solRM2c7 = RM2c7[[1]] /. {z -> z0, a -> a0, b -> b0};
xsolc7 = (Part[solRM2c7, 1] /. Rule -> List)[[2]];
ysolc7 = (Part[solRM2c7, 2] /. Rule -> List)[[2]];

```

```

In[50]:= Show[StreamPlot[{z0^(1/p) - x * a0^f, z0^(1/q) - y * b0 * a0^g - y * a0^d},
  {x, 0, 2}, {y, 0, 2}, Frame → True, FrameStyle → Directive[Black, 15],
  FrameLabel → {Style["x", 18], Style["y", 18]},
  FrameTicks → Automatic, FrameTicksStyle → Directive[Thick, Black, 15],
  LabelStyle → Directive[Black], PlotLabel → Style["Variables: x, y", Large],
  StreamColorFunction → None, StreamStyle → Black],
Graphics[{PointSize[Large], Red, Point[{xsolc7, ysolc7}]}],
FrameStyle → {Thick, Directive[Thick, Black]}]

```

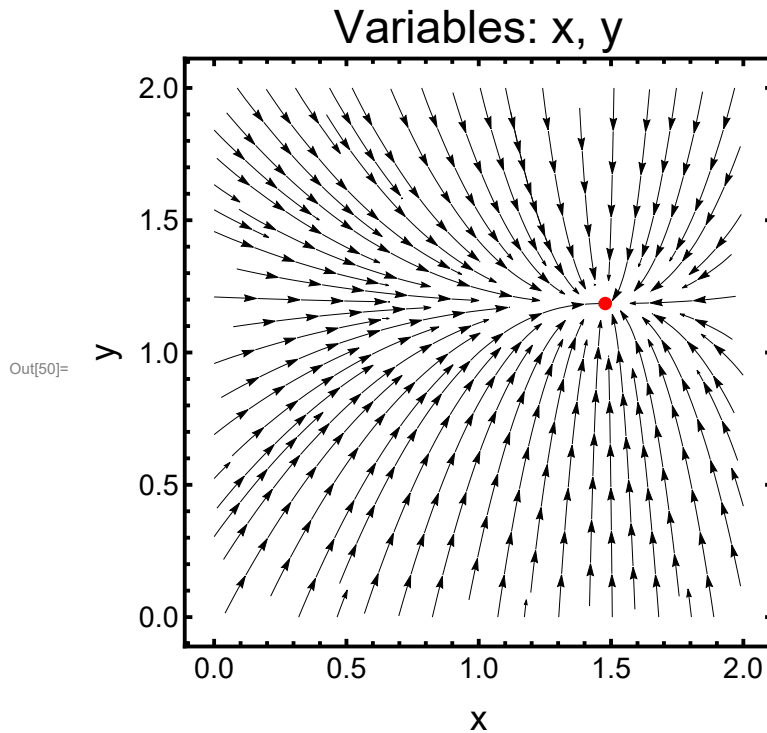

Type of critical point

Calculate the Jacobian

```

In[51]:= Jc7 = D[{z^(1/p) - x * a^f, z^(1/q) - y * b * a^g - y * a^d}, {{x, y}}]

```

```

Out[51]= {{-a^2, 0}, {0, -a^2 - a b}}

```

Calculate the Jacobian for the found steady states

```

In[52]:= Jc71 = Jc7 /. RM2c7[[1]]

```

```

Out[52]= {{-a^2, 0}, {0, -a^2 - a b}}

```

Eigen value equation (expansion of the characteristic equation)

```

In[53]:= eve7 = Solve[1^2 - 1 * Tr[Jc71] + Det[Jc71] == 0, 1]

```

```

Out[53]= {{1 -> -a^2}, {1 -> -a^2 - a b}}

```

Analyse the sign of  $\text{Tr}[J]$ ,  $\text{Det}[J]$  and  $\text{Tr}[J]^2 - 4 \text{Det}[J]$

```
In[54]:= Trc7 = Tr[Jc71]
Dc7 = Det[Jc71]
Sc7 = Tr[Jc71]^2 - 4 Det[Jc71]
Simplify[Sc7]
```

```
Out[54]= -2 a^2 - a b
```

```
Out[55]= a^4 + a^3 b
```

```
Out[56]= (-2 a^2 - a b)^2 - 4 (a^4 + a^3 b)
```

```
Out[57]= a^2 b^2
```

## Steady States Case 8

```
In[58]:= RM2c8 = Solve[{z^(1/p) - x*a^f == 0,
z^(1/q) - y*b*a^g - y*a^d == 0, x*a^f - y*b*a^g == 0}, {x, y, b}]
```

```
Out[58]= {{x -> (sqrt(z)/a^2), y -> (-sqrt(z) + z)/a^2, b -> (a + a*sqrt(z)/(-1 + z))}}
```

Steady State at given values

```
In[59]:= solRM2c8 = RM2c8[[1]] /. {z -> z0, a -> a0};
xsolc8 = (Part[solRM2c8, 1] /. Rule -> List)[[2]];
ysolc8 = (Part[solRM2c8, 2] /. Rule -> List)[[2]];
bsolc8 = (Part[solRM2c8, 3] /. Rule -> List)[[2]];
```



```

In[63]:= Show[StreamPlot3D[
  {z0^(1/p) - x*a0^f, z0^(1/q) - y*b*a0^g - y*a0^d, x*a0^f - y*b*a0^g},
  {x, -40, 40}, {y, -40, 40}, {b, -40, 40}, StreamMarkers → "Arrow",
  StreamColorFunction → (Blend[{Green, Blue, Black}, #5] &), StreamPoints → 60,
  StreamStyle → Thickness[2], AxesLabel → {"x", "y", "b"}],
Graphics3D[{PointSize[Large], Red, Point[{xsolc8, ysolc8, bsolc8}]}]]

```

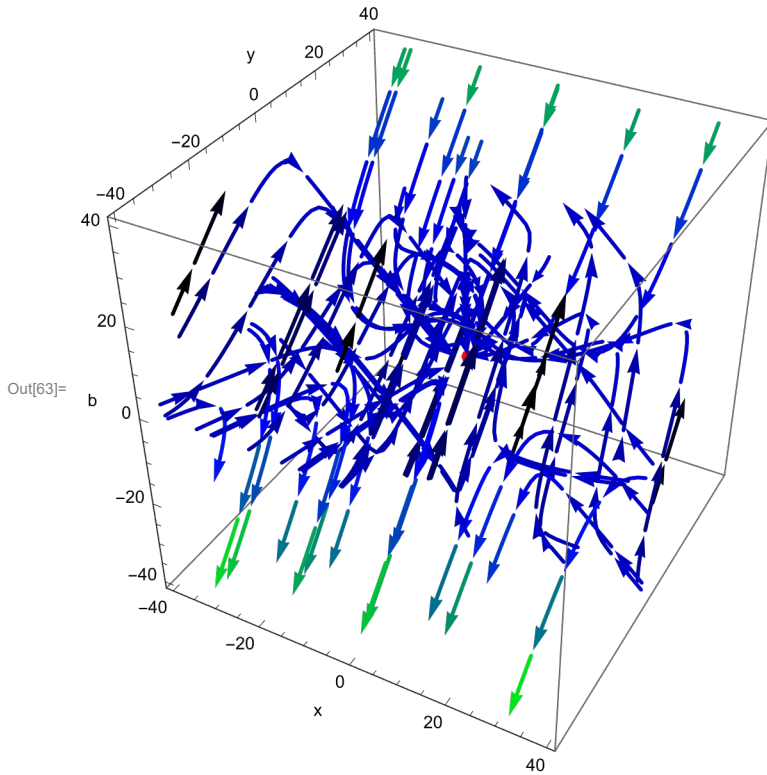

```

In[64]:= Show[SliceVectorPlot3D[
  {z0^(1/p) - x*a0^f, z0^(1/q) - y*b*a0^g - y*a0^d, x*a0^f - y*b*a0^g},
  {x == xsolc8, y == ysolc8, b == bsolc8}, {x, -10, 10}, {y, -10, 10},
  {b, -10, 10}, PlotTheme -> "Scientific", VectorAspectRatio -> 0.2,
  VectorColorFunction -> "TemperatureMap", AxesLabel -> {"x", "y", "b"},
  PlotLabel -> Style["Variables: x, y", Large]],
Graphics3D[Sphere[{xsolc8, ysolc8, bsolc8}, 2]]]

```

Variables: x, y

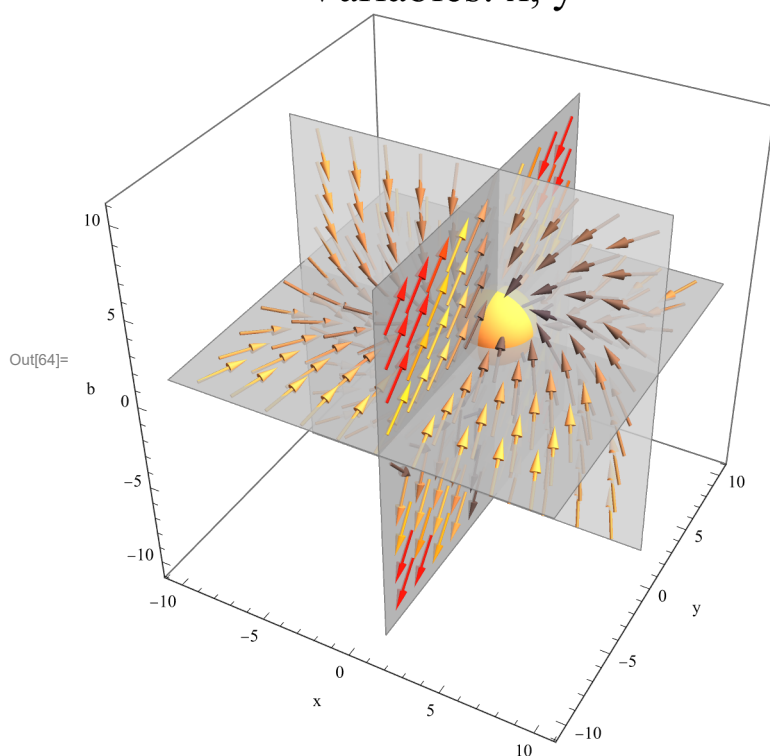

```
In[65]:= Show[SliceVectorPlot3D[
  {z0^(1/p) - x*a0^f, z0^(1/q) - y*b*a0^g - y*a0^d, x*a0^f - y*b*a0^g},
  "CenterCutSphere", {x, xsolc7-9, xsolc7+9}, {y, ysolc8-9, ysolc8+9},
  {b, bsolc8-9, bsolc8+9}, PlotTheme -> "Scientific",
  VectorAspectRatio -> 0.2, VectorColorFunction -> Hue,
  AxesLabel -> {"x", "y", "b"}, LabelStyle -> Directive[Black],
  PlotLabel -> Style["Variables: x, y, b", Medium, Bold]],
Graphics3D[{Red, Sphere[{xsolc8, ysolc8, bsolc8}, 0.5]}]]
```

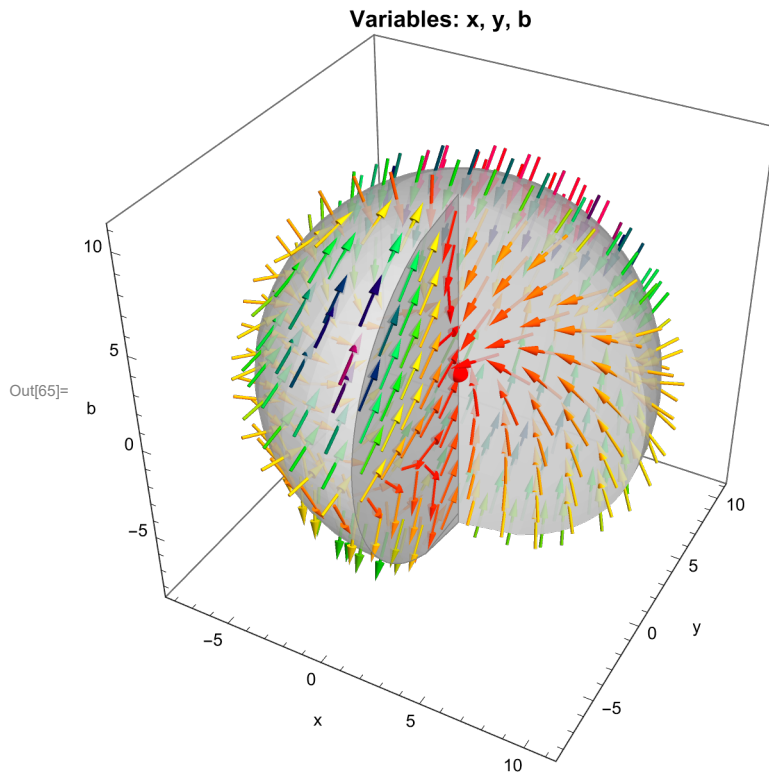

Type of critical point

Calculate the Jacobian

```
In[66]:= Jc8 =
  D[{z^(1/p) - x*a^f, z^(1/q) - y*b*a^g - y*a^d, x*a^f - y*b*a^g}, {{x, y, b}}]
```

```
Out[66]= {{-a^2, 0, 0}, {0, -a^2 - a b, -a y}, {a^2, -a b, -a y}}
```

Calculate the Jacobian for the found steady states

```
In[67]:= Jc81 = Jc8 /. RM2c8[[1]]
```

```
Out[67]= {{-a^2, 0, 0}, {0, -a^2 - \frac{a(a + a\sqrt{z})}{-1 + z}, -\frac{-\sqrt{z} + z}{a}}, {a^2, -\frac{a(a + a\sqrt{z})}{-1 + z}, -\frac{-\sqrt{z} + z}{a}}}
```

Eigen value equation (expansion of the characteristic equation)

In[68]:= **eve8 = Solve[1^2 - 1 \* Tr[Jc81] + Det[Jc81] == 0, 1]**

$$\text{Out[68]} = \left\{ \left\{ 1 \rightarrow \frac{1}{2} \times \left( -2a^2 - \frac{a(a + a\sqrt{z})}{-1+z} - \frac{-\sqrt{z} + z}{a} - \sqrt{-4(a^3\sqrt{z} - a^3z) + \left( 2a^2 + \frac{a(a + a\sqrt{z})}{-1+z} + \frac{-\sqrt{z} + z}{a} \right)^2} \right) \right\}, \right. \\ \left. \left\{ 1 \rightarrow \frac{1}{2} \times \left( -2a^2 - \frac{a(a + a\sqrt{z})}{-1+z} - \frac{-\sqrt{z} + z}{a} + \sqrt{-4(a^3\sqrt{z} - a^3z) + \left( 2a^2 + \frac{a(a + a\sqrt{z})}{-1+z} + \frac{-\sqrt{z} + z}{a} \right)^2} \right) \right\} \right\}$$

Analyse the sign of Tr[J], Det[J] and Tr[J]^2 - 4 Det[J]

In[69]:= **Trc8 = Tr[Jc81]**

**Dc8 = Det[Jc81]**

**Sc8 = Tr[Jc81]^2 - 4 Det[Jc81]**

**Simplify[Sc8]**

$$\text{Out[69]} = -2a^2 - \frac{a(a + a\sqrt{z})}{-1+z} - \frac{-\sqrt{z} + z}{a}$$

$$\text{Out[70]} = a^3\sqrt{z} - a^3z$$

$$\text{Out[71]} = -4(a^3\sqrt{z} - a^3z) + \left( -2a^2 - \frac{a(a + a\sqrt{z})}{-1+z} - \frac{-\sqrt{z} + z}{a} \right)^2$$

$$\text{Out[72]} = \frac{\left( a^3 \left( -2 + \frac{1}{1-\sqrt{z}} \right) + \sqrt{z} - z \right)^2}{a^2} + 4a^3(-\sqrt{z} + z)$$

## Cases from Table A4 (Appendix D)

RM1

Case 9 :  $x' = 0$ , var  $y, a$

Case 10 :  $y' = 0$ , var  $x, a$

Case 11: var  $x, y, a$

RM2s

Case 12 :  $x' = b' = 0$ , var  $y, a$

Case 13 :  $y' = b' = 0$ , var  $x, a$

RM2

Case 14 :  $x' = b' = 0$ , var  $y, a$

Case 15 :  $y' = b' = 0$ , var  $x, a$

Case 16 :  $x' = 0$ , var  $y, a, b$

Case 17 :  $y' = 0$ , var  $x, a, b$

Case 18 :  $a' = 0$ , var  $x, y, b$

Steady states :

In[73]:= **RM1c9 = Solve**[ $\{z^{(1/q)} - y * a^d == 0, -x * a^c - y * a^d == 0\}$ ,  $\{y, a\}$ ]

Out[73]=  $\left\{ \left\{ y \rightarrow \frac{x^2}{z}, a \rightarrow -\frac{z}{x} \right\} \right\}$

In[74]:= **RM1c10 = Solve**[ $\{z^{(1/p)} - x * a^c == 0, -x * a^c - y * a^d == 0\}$ ,  $\{x, a\}$ ]

Out[74]=  $\left\{ \left\{ x \rightarrow -\frac{i \sqrt{y} z^{1/4}}{\sqrt{y}}, a \rightarrow \frac{i z^{1/4}}{\sqrt{y}} \right\}, \left\{ x \rightarrow \frac{i \sqrt{y} z^{1/4}}{\sqrt{y}}, a \rightarrow -\frac{i z^{1/4}}{\sqrt{y}} \right\} \right\}$

In[75]:= **RM1c11 = Solve**[

$\{z^{(1/p)} - x * a^d == 0, z^{(1/q)} - y * a^d == 0, -x * a^c - y * a^d == 0\}$ ,  $\{x, y, a\}$ ]

Out[75]=  $\left\{ \left\{ x \rightarrow z^{3/2}, y \rightarrow z^2, a \rightarrow -\frac{1}{\sqrt{z}} \right\} \right\}$

In[76]:= **RM2sc12 = Solve**[ $\{z^{(1/q)} - y * b * a^g == 0, -x * a^f - y * b * a^g == 0\}$ ,  $\{y, a\}$ ]

Out[76]=  $\left\{ \left\{ y \rightarrow -\frac{i \sqrt{x} \sqrt{z}}{b}, a \rightarrow \frac{i \sqrt{z}}{\sqrt{x}} \right\}, \left\{ y \rightarrow \frac{i \sqrt{x} \sqrt{z}}{b}, a \rightarrow -\frac{i \sqrt{z}}{\sqrt{x}} \right\} \right\}$

In[77]:= **RM2sc13 = Solve**[ $\{z^{(1/p)} - x * a^f == 0, -x * a^f - y * b * a^g == 0\}$ ,  $\{x, a\}$ ]

Out[77]=  $\left\{ \left\{ x \rightarrow \frac{b^2 y^2}{\sqrt{z}}, a \rightarrow -\frac{\sqrt{z}}{b y} \right\} \right\}$

In[78]:= **RM2c14 =**

**Solve**[ $\{z^{(1/q)} - y * b * a^g - y * a^d == 0, -x * a^f - y * b * a^g - y * a^d == 0\}$ ,  $\{y, a\}$ ]

Out[78]=  $\left\{ \left\{ y \rightarrow \frac{i b x^{3/2} \sqrt{z} - x z}{b^2 x + z}, a \rightarrow -\frac{i \sqrt{z}}{\sqrt{x}} \right\}, \left\{ y \rightarrow \frac{-i b x^{3/2} \sqrt{z} - x z}{b^2 x + z}, a \rightarrow \frac{i \sqrt{z}}{\sqrt{x}} \right\} \right\}$

In[79]:= **RM2c15 = Solve**[ $\{z^{(1/p)} - x * a^f == 0, -x * a^f - y * b * a^g - y * a^d == 0\}$ ,  $\{x, a\}$ ]

Out[79]=  $\left\{ \left\{ x \rightarrow \frac{b^2 y^2 \sqrt{z} - b y^{3/2} \sqrt{b^2 y - 4 \sqrt{z}} \sqrt{z} - 2 y z}{2 z}, a \rightarrow \frac{-b y - \sqrt{y} \sqrt{b^2 y - 4 \sqrt{z}}}{2 y} \right\}, \left\{ x \rightarrow \frac{b^2 y^2 \sqrt{z} + b y^{3/2} \sqrt{b^2 y - 4 \sqrt{z}} \sqrt{z} - 2 y z}{2 z}, a \rightarrow \frac{-b y + \sqrt{y} \sqrt{b^2 y - 4 \sqrt{z}}}{2 y} \right\} \right\}$

In[80]:= **RM2c16 = Solve**[ $\{z^{(1/q)} - y * b * a^g - y * a^d == 0,$

$-x * a^f - y * b * a^g - y * a^d == 0, x * a^f - y * b * a^g == 0\}$ ,  $\{y, a, b\}$ ]

Out[80]=  $\left\{ \left\{ y \rightarrow -2 x, a \rightarrow -\frac{i \sqrt{z}}{\sqrt{x}}, b \rightarrow \frac{i \sqrt{z}}{2 \sqrt{x}} \right\}, \left\{ y \rightarrow -2 x, a \rightarrow \frac{i \sqrt{z}}{\sqrt{x}}, b \rightarrow -\frac{i \sqrt{z}}{2 \sqrt{x}} \right\} \right\}$

In[81]:= **RM2c17 = Solve**[{ **$z^{(1/p)} - x * a^f == 0$** ,

**$-x * a^f - y * b * a^g - y * a^d == 0$** ,  **$x * a^f - y * b * a^g == 0$** }, { **$x, a, b$** ]

Out[81]=  $\left\{ \left\{ x \rightarrow -\frac{y}{2}, a \rightarrow \frac{i \sqrt{2} z^{1/4}}{\sqrt{y}}, b \rightarrow -\frac{i z^{1/4}}{\sqrt{2} \sqrt{y}} \right\}, \left\{ x \rightarrow -\frac{y}{2}, a \rightarrow -\frac{i \sqrt{2} z^{1/4}}{\sqrt{y}}, b \rightarrow \frac{i z^{1/4}}{\sqrt{2} \sqrt{y}} \right\} \right\}$

In[82]:= **RM2c17 = Solve**[{ **$z^{(1/p)} - x * a^f == 0$** ,

**$z^{(1/q)} - y * b * a^g - y * a^d == 0$** ,  **$x * a^f - y * b * a^g == 0$** }, { **$x, y, b$** ]

Out[82]=  $\left\{ \left\{ x \rightarrow \frac{\sqrt{z}}{a^2}, y \rightarrow \frac{-\sqrt{z} + z}{a^2}, b \rightarrow \frac{a + a \sqrt{z}}{-1 + z} \right\} \right\}$
